# Supplementary material
Source: publisher site journal article supplement (https://www.dovepress.com/article/375938)
Supplement: Supplementary file 1 [file get_supplementary_file.php]

Table S1 Mixed logit model results: age subgroup

| **Attributes** | **age ≤40years (n=49)** | | | **age > 40 years (n=65)** | | |
| --- | --- | --- | --- | --- | --- | --- |
| **Coefficient (SE)** | **SD**  **(SE)** | **WTP**  **(95%CI)** | **Coefficient (SE)** | **SD**  **(SE)** | **WTP**  **(95%CI)** |
| **Injection pain** (ref: slight pain)   - Very slight pain | 2.433***  (0.569) | -1.763*** (0.507) | 45.7  (23.0, 68.5) | 2.119*** (0.371) | 1.669*** (0.351) | 45.6  (24.6, 66.6) |
| **Operation steps** (ref: manual injection method)   - Auto-injection method | 0.519  (0.361) | 1.828***  (0.458) | 9.8  (-5.1, 24.6) | 0.477  (0.323) | 1.911***  (0.400) | 10.3  (-4.5, 25.1) |
| **Size** (ref: thinner and not easy to hold)   - Thicker and easier to hold | 0.834*  (0.347) | -1.394***  (0.394) | 15.7  (4.4, 26.9) | 0.629**  (0.217) | 1.006***  (0.292) | 13.5  (3.4, 23.7) |
| **Needle visibility** (ref: visible needle)   - Hidden needle | 0.174  (0.399) | 3.029***  (0.882) | 3.3  (-11.0, 17.5) | 0.429**  (0.158) | 0.409  (0.345) | 9.2  (1.8, 16.7) |
| **Needle protection** (ref: without needle protection)   - With needle protection | 0.366  (0.262) | -1.254**  (0.420) | 6.9  (-4.4, 18.2) | 0.477*  (0.221) | -1.125***  (0.278) | 10.3  (0.6, 19.9) |
| **Feedback indication** (ref: visual indication only)   - Multiple visual, audible and tactile feedback indicators | 0.212  (0.249) | 1.035  (0.575) | 4.0  (-5.4, 13.4) | 0.637***  (0.168) | 0.191  (0.587) | 13.7  (5.5, 21.9) |
| **Out-of-pocket costs** | -0.053**  (0.019) | 0.053***  (0.015) | - | -0.046***  (0.010) | 0.054***  (0.011) | - |

**Abbreviations:** ref, reference; SE, standard error; SD, standard deviation; WTP, willingness-to-pay; CNY, Chinese Yuan; CI, confidence interval.

**Notes:** *P<0.05, **P<0.01, ***P<0.001.

Table S2 Mixed logit model results: education level subgroup

| **Attributes** | **Below junior college (n=27）** | | | **Junior college and above（n=87）** | | |
| --- | --- | --- | --- | --- | --- | --- |
| **Coefficient (SE)** | **SD**  **(SE)** | **WTP**  **(95%CI)** | **Coefficient (SE)** | **SD**  **(SE)** | **WTP**  **(95%CI)** |
| **Injection pain** (ref: slight pain)   - Very slight pain | 3.838**  (1.745) | 3.158**  (1.502) | 28.6 (13.9, 43.2) | 2.813***  (0.606) | 2.038***  (0.472) | 52.5  (38.5, 66.5) |
| **Operation steps** (ref: manual injection method)   - Auto-injection method | 1.340  (1.213) | 4.651**  (2.319) | 10  (-2, 22) | 0.568**  (0.275) | 1.959***  (0.374) | 10.6  (1.3, 19.9) |
| **Size** (ref: thinner and not easy to hold)   - Thicker and easier to hold | 1.170  (0.788) | 0.451  (0.409) | 8.7  (1.3, 16.1) | 1.093***  (0.356) | 1.577***  (0.418) | 20.4  (11.4, 29.4) |
| **Needle visibility** (ref: visible needle)   - Hidden needle | 0.625  (0.488) | 1.381  (0.961) | 4.7  (-2.3, 11.6) | 0.147  (0.226) | 2.073***  (0.438) | 2.7  (-5.8, 11.3) |
| **Needle protection** (ref: without needle protection)   - With needle protection | 0.801  (0.608) | 1.516*  (0.824) | 6  (-0.3, 12.3) | 0.513**  (0.22) | 1.586*** (0.399) | 9.6 (1.1, 18) |
| **Feedback indication** (ref: visual indication only)   - Multiple visual, audible and tactile feedback indicators | 0.871*  (0.457) | -0.654  (0.92) | 6.5  (-2.1, 15.1) | 0.477**  (0.206) | 0.932*** (0.306) | 8.9  (2.2, 15.6) |
| **Out-of-pocket costs** | -0.134*  (0.073) | -0.092*  (0.05) | - | -0.054***  (0.013) | 0.059***  (0.013) | - |

**Abbreviations:** ref, reference; SE, standard error; SD, standard deviation; WTP, willingness-to-pay; CNY, Chinese Yuan; CI, confidence interval.

**Notes:** *P<0.05, **P<0.01, ***P<0.001.

Table S3 Mixed logit model results: monthly household income subgroup

| **Attributes** | **Monthly income < CNY 15,000（n=53）** | | | **Monthly income ≥ CNY 15,000（n=61）** | | |
| --- | --- | --- | --- | --- | --- | --- |
| **Coefficient (SE)** | **SD**  **(SE)** | **WTP**  **(95%CI)** | **Coefficient (SE)** | **SD**  **(SE)** | **WTP**  **(95%CI)** |
| **Injection pain** (ref: slight pain)   - Very slight pain | 2.058***  (0.417) | 2.130*** (0.519) | 37.8  (18.9, 56.7) | 4.191*** (1.251) | 2.457*** (0.705) | 56.3  (41.2, 71.4) |
| **Operation steps** (ref: manual injection method)   - Auto-injection method | 0.980** (0.369) | 1.864***  (0.476) | 18.0  (4.3, 31.7) | 0.867  (0.487) | 4.272**  (1.365) | 11.6  (1.2, 22.1) |
| **Size** (ref: thinner and not easy to hold)   - Thicker and easier to hold | 0.756***  (0.238) | -0.779**  (0.293) | 13.9  (4.6, 23.1) | 0.464  (0.425) | 3.090**  (1.045) | 6.2  (-5.9, 18.3) |
| **Needle visibility** (ref: visible needle)   - Hidden needle | 0.440* (0.223) | 0.951**  (0.327) | 8.1  (0.1, 16.1) | 0.491  (0.442) | 4.257** (1.470) | 6.6  (-4.9, 18.1) |
| **Needle protection** (ref: without needle protection)   - With needle protection | 0.707* (0.282) | 1.116***  (0.321) | 13.0  (2.7, 23.3) | 1.013*  (0.453) | 2.616**  (0.897) | 13.6  (4.2, 23.1) |
| **Feedback indication** (ref: visual indication only)   - Multiple visual, audible and tactile feedback indicators | 0.543** (0.196) | -0.110 (0.335) | 10.0  (2.8, 17.2) | 1.017*  (0.493) | 2.098** (0.776) | 13.7  (4.3, 23.1) |
| **Out-of-pocket costs** | -0.054***  (0.013) | 0.058***  (0.015) | - | -0.074***  (0.022) | 0.081***  (0.023) | - |

**Abbreviations:** ref, reference; SE, standard error; SD, standard deviation; WTP, willingness-to-pay; CNY, Chinese Yuan; CI, confidence interval.

**Notes:** *P<0.05, **P<0.01, ***P<0.001.

Table S4 Mixed logit model results: reimbursement status subgroup

| **Attributes** | **With reimbursement（n=85）** | | | **Without reimbursement（n=29）** | | |
| --- | --- | --- | --- | --- | --- | --- |
| **Coefficient (SE)** | **SD**  **(SE)** | **WTP**  **(95%CI)** | **Coefficient (SE)** | **SD**  **(SE)** | **WTP**  **(95%CI)** | |
| **Injection pain** (ref: slight pain)   - Very slight pain | 2.868***  (0.566) | 2.437*** (0.524) | 51.3  (35.5, 67.0) | 2.142*** (0.531) | 1.430** (0.459) | 44.7  (17.2, 72.2) | |
| **Operation steps** (ref: manual injection method)   - Auto-injection method | 0.617  (0.329) | 2.251***  (0.445) | 11.0  (0.7, 21.3) | 0.781  (0.518) | 2.405***  (0.736) | 16.3  (-5.3, 37.9) | |
| **Size** (ref: thinner and not easy to hold)   - Thicker and easier to hold | 0.668**  (0.249) | 1.799***  (0.430) | 11.9  (2.9, 20.9) | 0.834**  (0.303) | 0.189  (0.667) | 17.4  (5.2, 29.6) | |
| **Needle visibility** (ref: visible needle)   - Hidden needle | 0.455  (0.267) | 2.137***  (0.531) | 8.1  (-1.4, 17.7) | 0.010  (0.470) | 1.570** (0.542) | 0.2  (-19.0, 19.4) | |
| **Needle protection** (ref: without needle protection)   - With needle protection | 0.426  (0.248) | 1.825***  (0.448) | 7.6  (-1.3, 16.5) | 0.482  (0.301) | -0.840*  (0.362) | 10.1  (-1.3, 21.4) | |
| **Feedback indication** (ref: visual indication only)   - Multiple visual, audible and tactile feedback indicators | 0.574**  (0.215) | -1.149** (0.416) | 10.3  (3.4, 17.2) | 0.545  (0.375) | 0.742 (0.398) | 11.4  (-1.6, 24.3) | |
| **Out-of-pocket costs** | -0.056***  (0.012) | 0.072***  (0.016) | - | -0.048***  (0.015) | 0.037*  (0.015) | - | |

**Abbreviations:** ref, reference; SE, standard error; SD, standard deviation; WTP, willingness-to-pay; CNY, Chinese Yuan; CI, confidence interval.

**Notes:** *P<0.05, **P<0.01, ***P<0.001.

Table S5 Mixed logit model results: injection experience subgroup

| **Attributes** | **Experienced injection out of the hospitals (n=57)** | | | **Experienced injection in hospitals only (n=57)** | | |
| --- | --- | --- | --- | --- | --- | --- |
| **Coefficient (SE)** | **SD**  **(SE)** | **WTP**  **(95%CI)** | **Coefficient (SE)** | **SD**  **(SE)** | **WTP**  **(95%CI)** |
| **Injection pain** (ref: slight pain)   - Very slight pain | 2.290***  (0.447) | 1.555*** (0.463) | 47.5  (27.3, 67.7) | 2.069*** (0.393) | 1.924*** (0.438) | 62.0  (28.9, 95.2) |
| **Operation steps** (ref: manual injection method)   - Auto-injection method | 1.367* (0.576) | 2.079***  (0.493) | 28.4  (4.0, 52.7) | -0.316  (0.295) | 1.652***  (0.365) | -9.5  (-27.1, 8.2) |
| **Size** (ref: thinner and not easy to hold)   - Thicker and easier to hold | 0.990***  (0.289) | -0.465 (0.327) | 20.5  (9.1, 31.9) | 0.502  (0.311) | -1.438***  (0.337) | 15.1  (-4.4, 34.5) |
| **Needle visibility** (ref: visible needle)   - Hidden needle | 0.242 (0.225) | 1.167**  (0.402) | 5.0  (-4.2, 14.2) | 0.481  (0.361) | 2.174*** (0.594) | 14.4  (-9.0, 37.8) |
| **Needle protection** (ref: without needle protection)   - With needle protection | 0.662* (0.265) | -0.968**  (0.358) | 13.7  (2.8, 24.7) | 0.342  (0.241) | 1.431***  (0.347) | 10.3  (-4.0, 24.5) |
| **Feedback indication** (ref: visual indication only)   - Multiple visual, audible and tactile feedback indicators | 0.572* (0.234) | 0.696 (0.435) | 11.9  (2.2, 21.5) | 0.372  (0.191) | 0.519 (0.312) | 11.2  (-1.3, 23.6) |
| **Out-of-pocket costs** | -0.048***  (0.011) | 0.055***  (0.017) | - | -0.033***  (0.009) | 0.057***  (0.012) | - |

**Abbreviations:** ref, reference; SE, standard error; SD, standard deviation; WTP, willingness-to-pay; CNY, Chinese Yuan; CI, confidence interval.

**Notes:** *P<0.05, **P<0.01, ***P<0.001.
